# Supplementary material for: An electrochemical biosensor for detection of the sepsis-related biomarker procalcitonin
Source: Royal Society of Chemistry journal article supplement (doi:10.1039/c7ra06553a), 2017-01-01

**Supporting Information for;**

An electrochemical biosensor for detection of the sepsis-related biomarker  
procalcitonin

Jong Min Lim<sup>1</sup>, Myung Yi Ryu<sup>1</sup>, Ji Hong Kim<sup>1</sup>, Chae Hwan Cho<sup>1</sup>, Tae Jung Park<sup>2</sup>, Jong Pil Park<sup>1\*</sup>

<sup>1</sup>Department of Pharmaceutical Engineering, Daegu Haany University, Gyeongsan 38610, Republic of Korea. Email: jppark@dhu.ac.kr; Fax: +82-53-819-1406

<sup>2</sup>Department of Chemistry, Chung-Ang University, Seoul 06974, Republic of Korea

## *Chemicals*

Bovine serum albumin (BSA) was purchased from Sigma-Aldrich (St. Louis, MO, USA). Human recombinant procalcitonin proteins were purchased from Randox Life Science (Crumlin, UK). A series of synthetic peptides modified with a C-terminal cysteine, and a flexible linker (-GGGGS-) were chemically synthesized (> 95% purity) by Peptron (Daejeon, Korea), as shown in Table S1. The quartz crystals deposited with gold were obtained from Biolin Scientific (Stockholm, Sweden). Phosphate-buffered saline (PBS, pH 7.4) and Tris-HCl buffer solutions were used to make all proteins, human plasma samples, and synthetic peptide solutions for CV and EIS measurements. Unless otherwise stated, all reagents were analytical grade.

## *Preparation of the affinity peptide-modified electrode*

The peptide-functionalized gold electrode was prepared by the following steps. First, the gold electrode was immersed into piranha solution ( $\text{H}_2\text{SO}_4:\text{H}_2\text{O}_2 = 4:1$ , v/v) for 10 min to remove residual dust and impurities on the surface layer of the gold electrode. The electrode was then rinsed with deionized (DI) water several times. This pre-functionalized electrode was dried by blowing with  $\text{N}_2$  gas for several seconds. After these polishing steps, the electrode and voltammetric cell were assembled, and 100  $\mu\text{L}$  of thiol-modified synthetic peptides (50  $\mu\text{g}/\text{mL}$ ) were dropped onto the gold electrode and incubated at room temperature for 1 h. To remove unbound synthetic peptides, the cell was washed with 1X PBS (pH 7.4) and then again with DI water. Next, 2  $\mu\text{L}$  of pure procalcitonin proteins was loaded onto each assembled cell and then incubated at room temperature for 1 h. The cells were again sequentially washed with 1X PBS and DI water to remove the unbound proteins.

### *CV and EIS measurements*

A conventional three-electrode system, including a working electrode, platinum counter electrode, and Ag/AgCl reference electrode, was used for the electrochemical measurements. CV and EIS were performed using an electrochemical analyzer (CHI 750E, CH Instruments, Austin, TX, USA) connected to a computer data analysis system. These analyses were conducted in a PBS solution with 4 mM ferro/ferricyanide. The CV was recorded from 0.0 V to +0.4 V vs. an Ag/AgCl electrode at a sweep rate of 20 mV/s. EIS was carried out at a formal DC potential of 0.2 V using an alternating voltage of 10 mV in the frequency range from 10 Hz to 10 kHz.

**Table S1.** The affinity synthetic peptides used in this study

| Names   | Sequence          | Predicted pI* <sup>1</sup> | Predicted M.W* <sup>2</sup> | Notes                                                                                                                                                                                                                                                                                   |
|---------|-------------------|----------------------------|-----------------------------|-----------------------------------------------------------------------------------------------------------------------------------------------------------------------------------------------------------------------------------------------------------------------------------------|
| PCT BP1 | MSCAGHMCTRFVGGGGC | 8.06                       | 1673.99                     | Selected upon biopanning<br>Used as peptide scaffold for rational design                                                                                                                                                                                                                |
| PCT BP2 | MSCAGDMCTEFVGGGGC | 3.55                       | 1624.87                     | Substitution of His to Asp at position of 6<br>Substitution of Arg to Glu at position of 10<br>Used to determine the effect of polar (positive) amino acid residues on binding interactions                                                                                             |
| PCT BP3 | TSCNGHTCTRYNGGGGC | 8.06                       | 1687.80                     | Substitution of Met to Thr at position of 1 and 7<br>Substitution of Ala to Asn at position of 4<br>Substitution of Phe to Tyr at position of 11<br>Substitution of Val to Asn at position of 12<br>Used to determine the effect of neutral amino acid residues on binding interactions |
| PCT BP4 | MSGAGHMGTRFVGGGGC | 8.55                       | 1581.81                     | Substitution of Cys to Gly at positions of 3 and 8<br>Used to determine the effect of cysteine amino acid on binding interactions                                                                                                                                                       |

\*<sup>1</sup> and \*<sup>2</sup>: The prediction of isoelectric point (pI) and molecular weight of the affinity peptides were performed at Peptide Property Calculator (<http://www.genscript.com>).

**Table S2.** Analytical performance for the detection of procalcitonin

| Detection method                                       | Target        | Limit of detection (LOD) | Reference         |
|--------------------------------------------------------|---------------|--------------------------|-------------------|
| Immunoluminometric assay                               | procalcitonin | 0.1 ng/mL                | [1]               |
| Sandwich-type electrochemical immunosensor             | procalcitonin | 0.5 pg/mL                | [2]               |
| Optical immunosensor                                   | procalcitonin | 88 µg/mL                 | [3]               |
| Sandwich immunoassay                                   | procalcitonin | 2.5-2.6 µg/mL            | [4]               |
| Affinity peptide sensor with electrochemical detection | procalcitonin | 12.5 ng/mL               | <b>This study</b> |

Additional references;

<sup>1</sup> A. Viallon, F. Zeni, C. Lambert, B. Pozzetto, B. Tardy, C. Venet, J.-C. Bertrand, *Clin. Infectious Dis.* 1999, **28**, 1310-1316.

<sup>2</sup> Y.-S. Fang, H.-Y. Wang, L.-S. Wang, J.-F. Wang, *Biosen. Bioelectron.* 2014, **51**, 310-316.

<sup>3</sup> F. Baldini, L. Bolzoni, A. Giannetti, M. Kess, P. Kramer, E. Kremmer, G. Porro, F. Senesi, C. Trono, *Anal. Bioanal. Chem.* 2009, **393**, 1183-1190.

<sup>4</sup> E. Kremmer, K. Meyer, F.A. Grasser, A. Flatley, M. Koters, P.B. Lupp, P.M. Kramer, *Anal. Bioanal. Chem.* 2012, **402**, 989-995.

**Figure S1.** The Principle of operation of our sensor used in this study. A) Schematic illustration of basic principle of our sensor system. B) Equivalent circuit model for EIS measurements.

a)

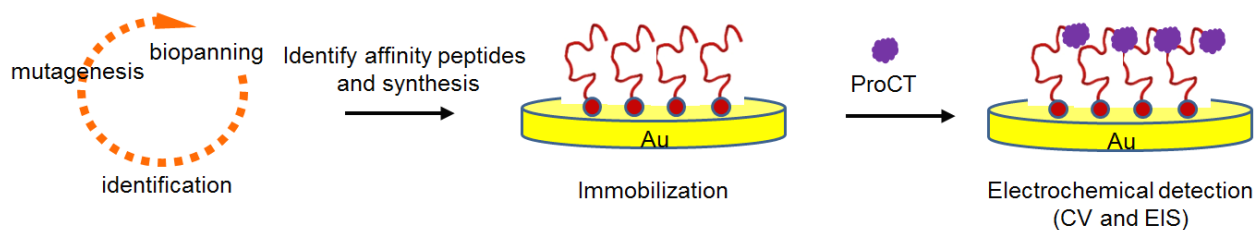

b)

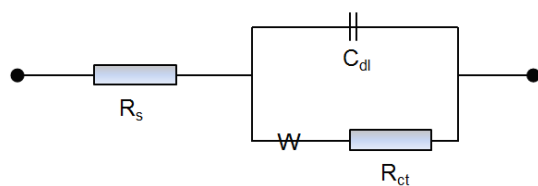

**Figure S2.** The performance of the sensor. a) Stability test of the sensor. PCT BP3 peptide (2.5 mg/mL) was immobilized on the gold electrode with different time range (0-5 hr) at room temperature and added ProCT or BSA. The  $R_{ct}$  value was measured by EIS. b) Effect of serum on binding interactions. Binding affinity of the PCT BP3 was comparable in the presence of 0.5% FBS compared with ProCT alone. In addition, PCT BP3 peptides do not have sufficient binding affinity to BSA as a negative control.

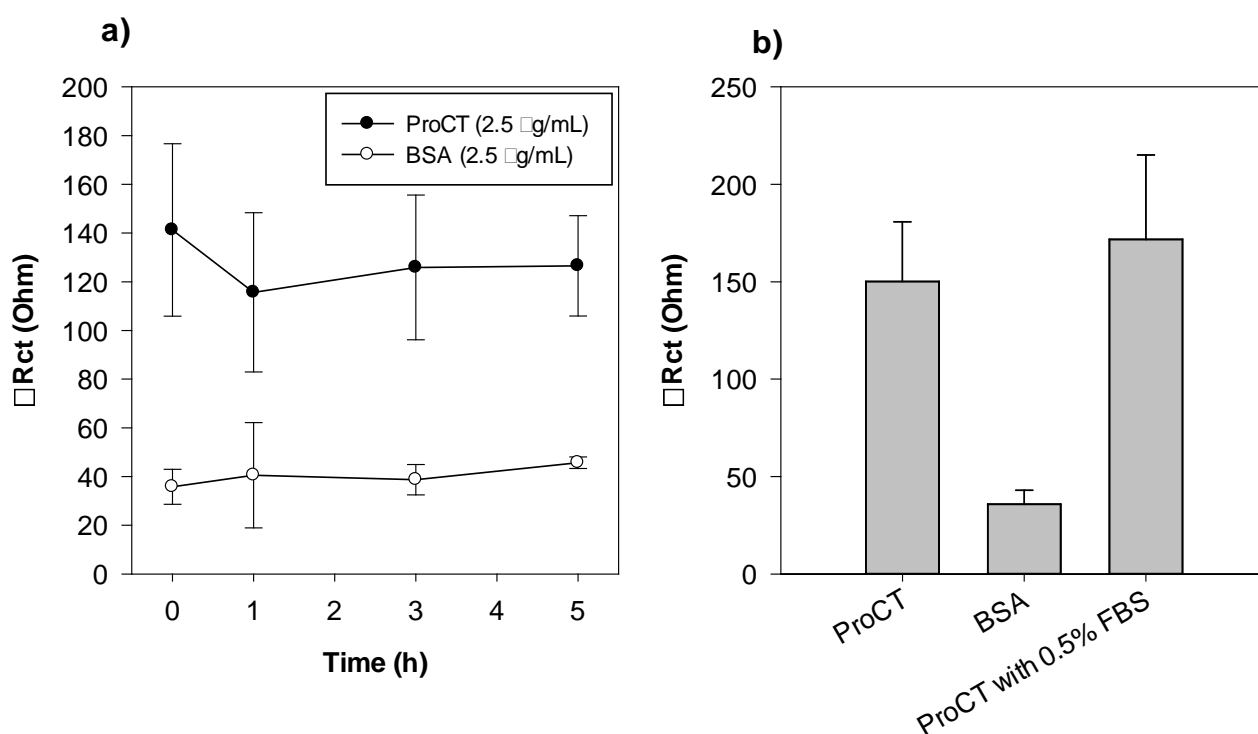

Supplement: c7ra06553a1.pdf [file c7ra06553a1.pdf]
